# Supplementary material for: Magnetic hydroxyapatite nanomaterial–cyclodextrin tethered polymer hybrids as anticancer drug carriers
Source: Royal Society of Chemistry journal article supplement (doi:10.1039/d1ma00142f), 2021-01-01
Supplement: d1ma00142f1.pdf [file d1ma00142f1.pdf]

# Magnetic hydroxyapatite nanomaterial–cyclodextrin tethered polymer hybrids as anticancer drug carriers

Sivaraj Ramasamy,<sup>a</sup> Dinesh Dhamecha,<sup>b</sup> Kiruthiga Kaliyamoorthi,<sup>c</sup> Archana Sumohan Pillai,<sup>d</sup> Aleyamma Alexander,<sup>d</sup> Premnath Dhanaraj,<sup>e</sup> Jyothi U. Menon<sup>b\*</sup>, Israel V. Muthu Vijayan Enoch,<sup>d\*</sup>

<sup>a</sup>Functional polymers and Materials Laboratory, Department of Smart Green Technology and Engineering, Pukyong National University, South Korea.

<sup>b</sup>Department of Biomedical and Pharmaceutical Sciences, College of Pharmacy, University of Rhode Island, Kingston, RI 02881, USA.

<sup>c</sup>Department of Chemistry and Department of Chemical Engineering, Hindustan Institute of Technology and Science, Chennai 603103, Tamil Nadu, India.

<sup>d</sup>Centre for Nanoscience and Genomics, Karunya Institute of Technology and Sciences, Coimbatore 641114, Tamil Nadu, India.

<sup>e</sup>Department of Biotechnology, Karunya Institute of Technology and Sciences, Coimbatore 641114, Tamil Nadu, India.

\*Corresponding authors. e-mails: israelenoch@karunya.edu; jmenon@uri.edu

## Supplementary Material

### Index

**S 1** IR Spectrum of Ch-CD-fol.

**S 2A** <sup>1</sup>H NMR spectrum of Ch-CD-fol.

**S 2B** <sup>13</sup>C NMR spectrum of Ch-CD-fol.

**S 3** Energy-dispersive X-ray spectra of as-synthesized Sr-Fe, Sr-Hap, and Sr-Fe-Hap.

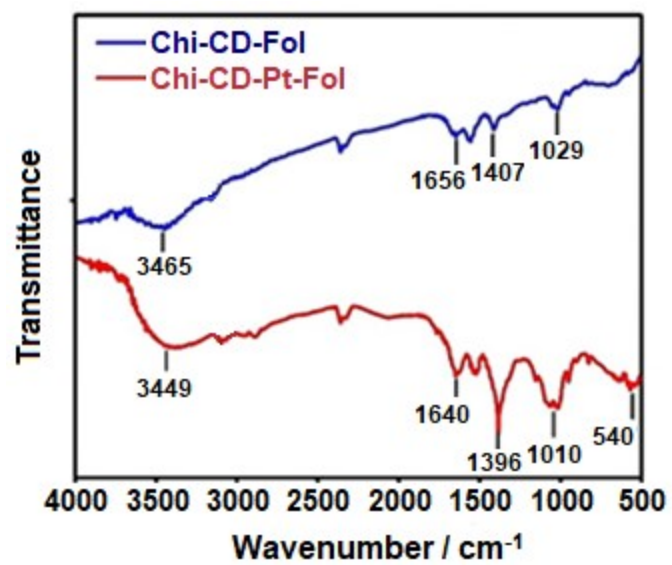

S 1 IR Spectrum of Ch-CD-fol.

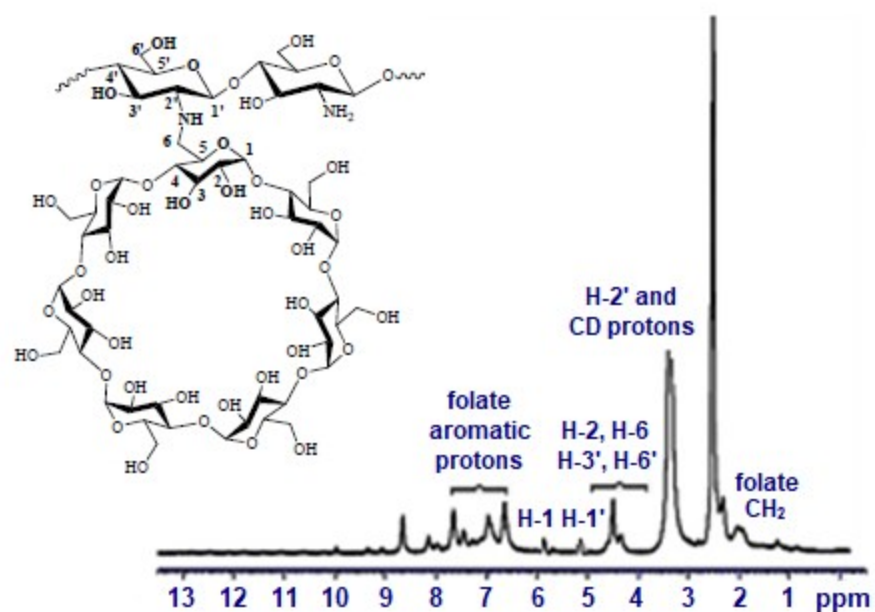

**S 2A** <sup>1</sup>H NMR spectrum of Ch-CD-fol.

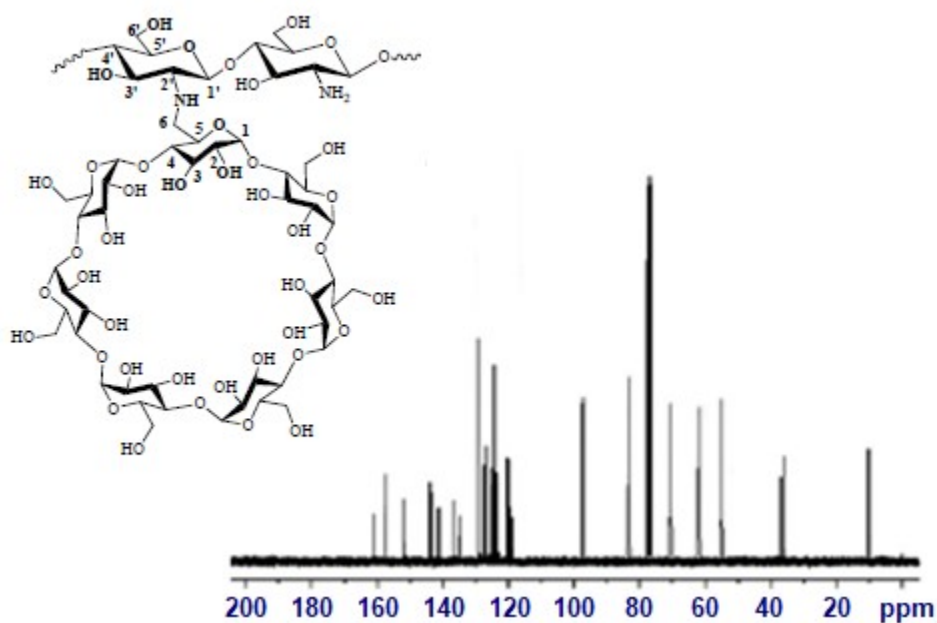

**S 2B** <sup>13</sup>C NMR spectrum of Ch-CD-fol. C=O (fol), 161.5, 158.2; Ar (fol), 145-120; (C-1' (Chi), 98.1; C-4' (Chi), C-2 (CD), 82.3; 78.1; C-3' (Chi), C-3, C-4, C-5 (CD), 71.1; C-6' (Chi), 61.8; C-2' (Chi), 56.8 ppm; CH<sub>2</sub> (fol), 36.2 ppm.

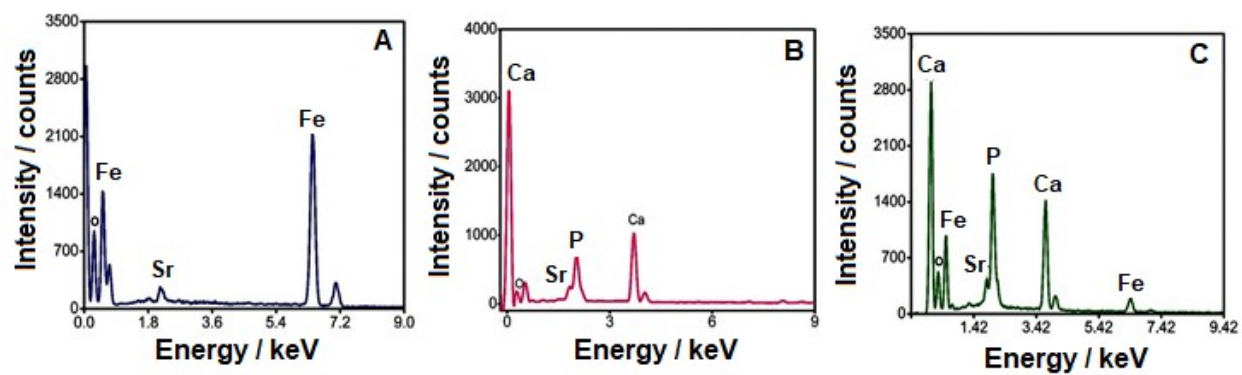

**S 3** Energy-dispersive X-ray spectra of as-synthesized Sr-Fe, Sr-Hap, and Sr-Fe-Hap.
